# Supplementary material for: FGF8 is required for cell survival at distinct stages of nephrogenesis and for regulation of gene expression in nascent nephrons
Source: Oxford University Press journal article supplement (doi:10.1242/dev.01944), 2005-07-28
Supplement: dev01944tables.pdf [file dev01944tables.pdf]

**Table S1. Sequences for PCR primers to generate templates for RNA probe synthesis**

| Gene name                |   | Primer sequence                | Product size |
|--------------------------|---|--------------------------------|--------------|
| <i>Slc34a1</i> , probe 1 | F | 5'-CTTCTTCAACATCTCGGGCATC-3'   |              |
|                          | R | 5'-TCTGTCTTTCTACTGTGGGCATTG-3' | 556 bp       |
| <i>Slc34a1</i> , probe 2 | F | 5'-CGCTGGTGTTTGGCATTTC-3'      |              |
|                          | R | 5'-GCACTAATGGTCACACAGGCTCAG-3' | 580 bp       |
| <i>Slc12a3</i> , probe 1 | F | 5'-CCTTTGATACCCAGAGCCATAATG-3' |              |
|                          | R | 5'-AATGAATGCAGGTCAGCCAGG-3'    | 290 bp       |
| <i>Slc12a3</i> , probe 2 | F | 5'-GTGGCACCTATTTCTTATTTC-3'    |              |
|                          | R | 5'-CCCTTACGGTTTCTGCAAAGC-3'    | 129 bp       |
| <i>Wnt4</i> , probe 1    | F | 5'-GGAGACGTGCGAGAACTCAAAG-3'   |              |
|                          | R | 5'-TGTGTCACCACCTTCCCAAAGAC-3'  | 192 bp       |
| <i>Wnt4</i> , probe 2    | F | 5'-CGCTAAAGGAGAAGTTTGACGGTG-3' |              |
|                          | R | 5'-GGTCCTCATCTGTATGTGGCTTG-3'  | 111 bp       |
| <i>Podxl</i> , probe 1   | F | 5'-GCCAAGCAACCCTACACCATTC-3'   |              |
|                          | R | 5'-TCGCTGTGCTCGGTGAAGAATC-3'   | 359 bp       |
| <i>Podxl</i> , probe 2   | F | 5'-AATGGTCTGTGATGGTCACGGG-3'   |              |
|                          | R | 5'-GCCTCATTCTGCTGGACATTCC-3'   | 394 bp       |
| T7 sequence              |   | 5'-ATTGTAATACGACTCACTATAGGG-3' |              |

To generate probes for the genes listed, we amplified two different PCR products specific for exon sequences of each gene using mouse genomic DNA as a template. The reverse primers had a 5' extension that included the T7 promoter for in vitro transcription. The two resulting probes for each gene were combined in the hybridization solution.

F, forward primer; R, reverse primer.

The sequence of the T7 promoter is highlighted.

**Table S2. Total number of collecting duct tips in kidneys of normal and mutant littermates**

|                              | Number of collecting duct tips |                 |                |
|------------------------------|--------------------------------|-----------------|----------------|
|                              | E13.5                          | E15.5           | E17.5          |
| Normal littermates           | 89.6±25.5                      | 337.4±39.2      | 874±61.9       |
| <i>Fgf8</i> -MM-KO           | 40.3±10.1 (45%)                | 90.5±25.1 (27%) | 148±25.3 (20%) |
| Normal littermates           | 79.5±22.7                      | 397.2±33.9      | 1098±147       |
| Severe <i>Fgf8</i> hypomorph | 60.1±15.3 (76%)                | 284.3±55 (72%)  | 518±61 (47%)   |

Total number of collecting duct tips in kidneys of normal and mutant littermates was quantified as previously described (Cebrián et al., 2004). Briefly, 100 µm vibratome-sectioned kidneys were permeabilized and assayed for immunofluorescent staining using primary antibodies against Calbindin D<sub>28K</sub>(CD). CD-positive duct tips were visualized under fluorescent microscopy and quantified in all sections of a given kidney. A minimum of seven kidneys at each developmental stage was analyzed with values expressed as mean±s.d.

## Reference

Cebrián, C., Borodo, K., Charles, N. and Herzlinger, D. A. (2004). Morphometric index of the developing murine kidney. *Dev. Dyn.* **231**, 601-608.

**Table 3. Total number of renal corpuscles in kidneys of normal and mutant littermates**

|                              | Number of renal corpuscles |                  |
|------------------------------|----------------------------|------------------|
|                              | E15.5                      | E18.5            |
| Normal littermates           | 379±28                     | 2519±374         |
| Mild <i>Fgf8</i> hypomorph   | 265±32 (70%)               | 912.5±83.3 (36%) |
| Normal littermates           | 427±34                     | 2812±409         |
| Severe <i>Fgf8</i> hypomorph | 201±37 (47%)               | 531±76.5 (19%)   |

Samples were analyzed as described in Table S2, using primary antibodies against Wilms' tumor 1 protein (WT1). Overprojection bias was corrected as previously described by Cebrián et al. (Cebrián et al., 2004). A minimum of five kidneys at each developmental stage was analyzed with values expressed as mean±s.d.

## Reference

Cebrián, C., Borodo, K., Charles, N. and Herzlinger, D. A. (2004). Morphometric index of the developing murine kidney. *Dev. Dyn.* **231**, 601-608.
